# Supplementary material for: Divergent effects of RIP1 or RIP3 blockade in murine models of acute liver injury
Source: PubMed Central journal article supplement (PMC4669705; doi:10.1038/cddis.2015.126), 2015-05-07

Supplemental Figure 1

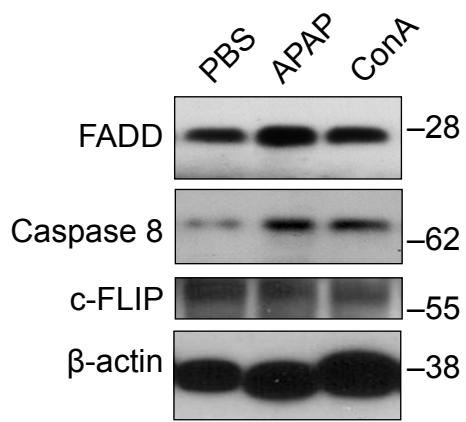

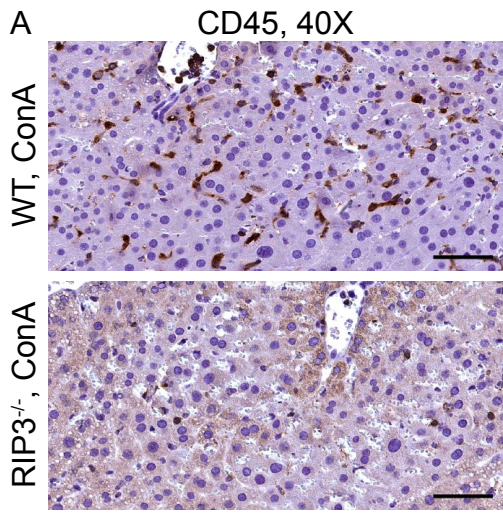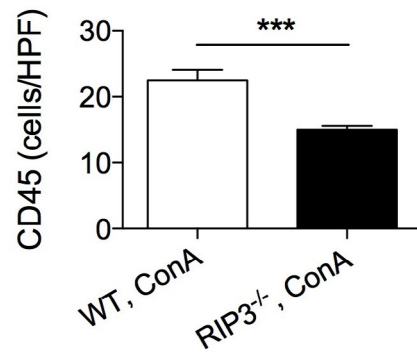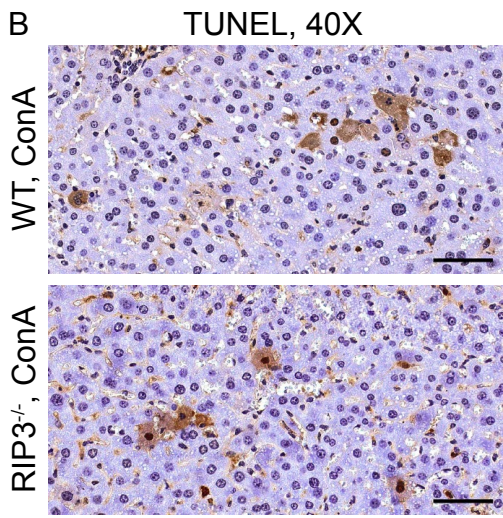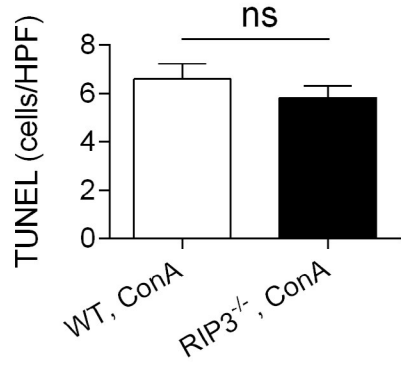

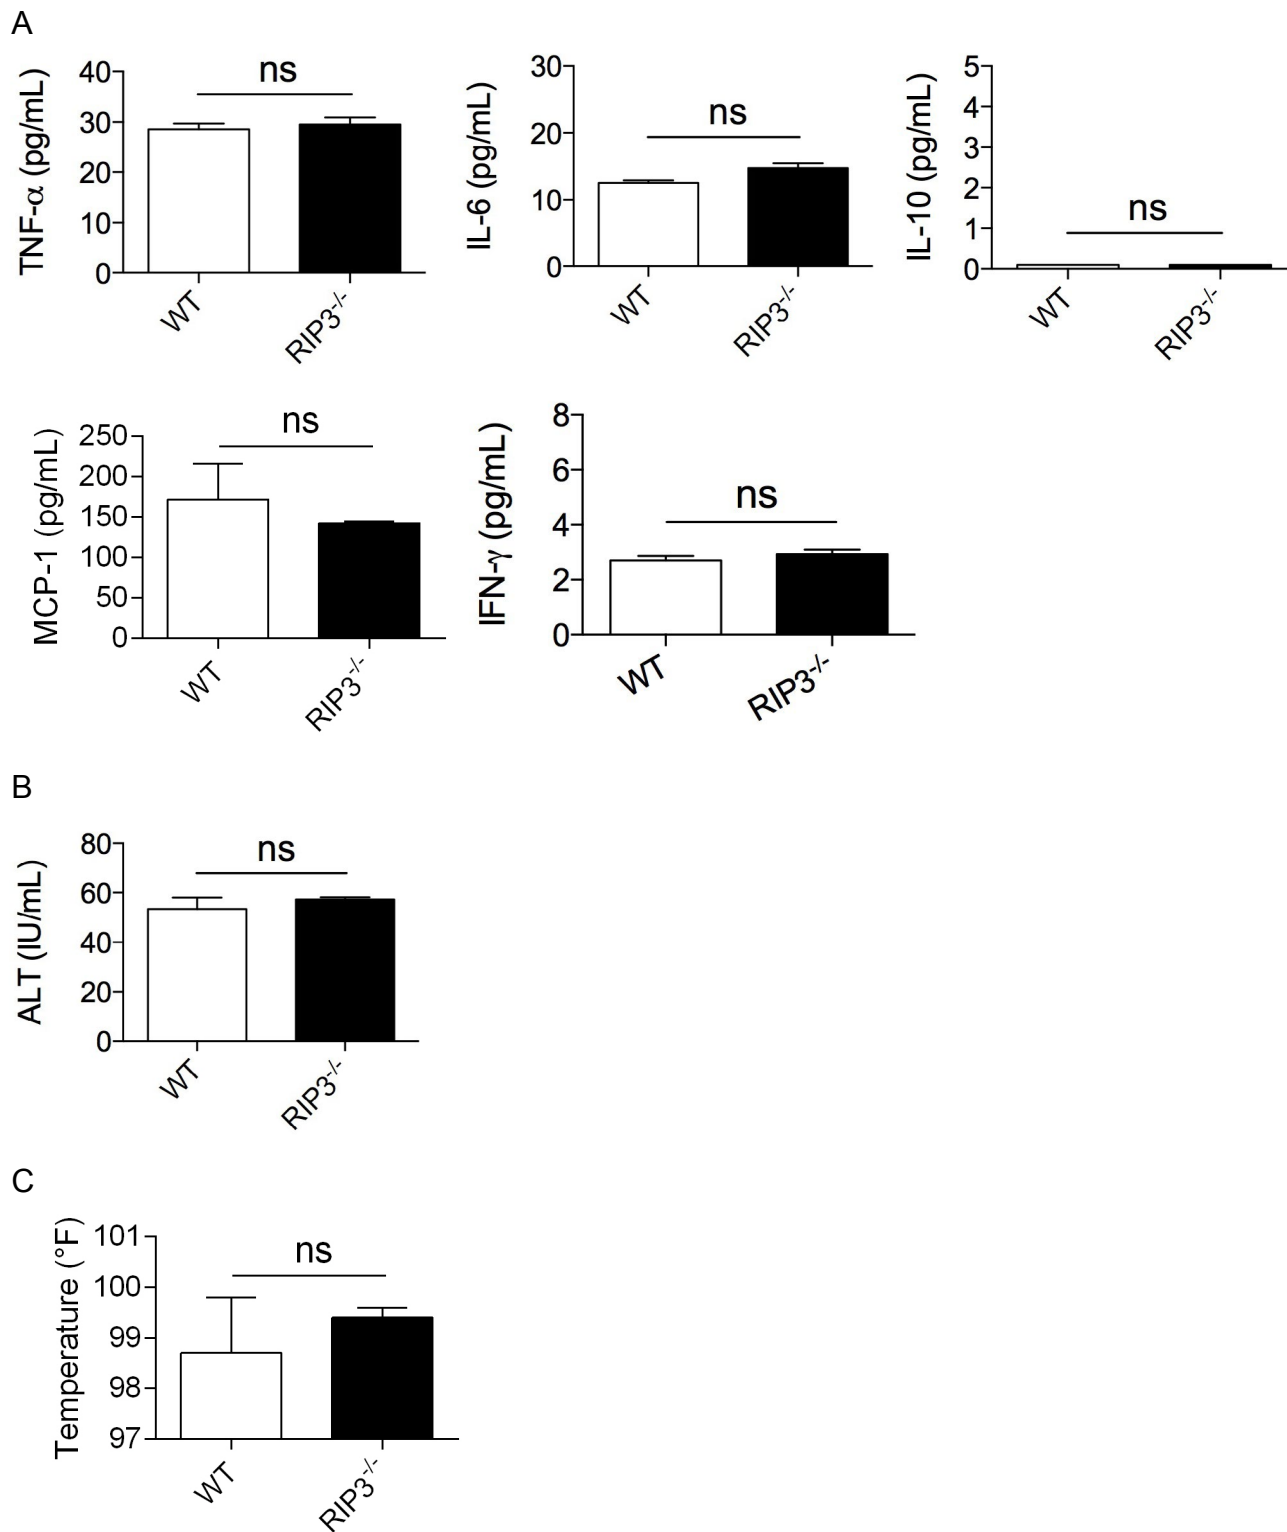

A

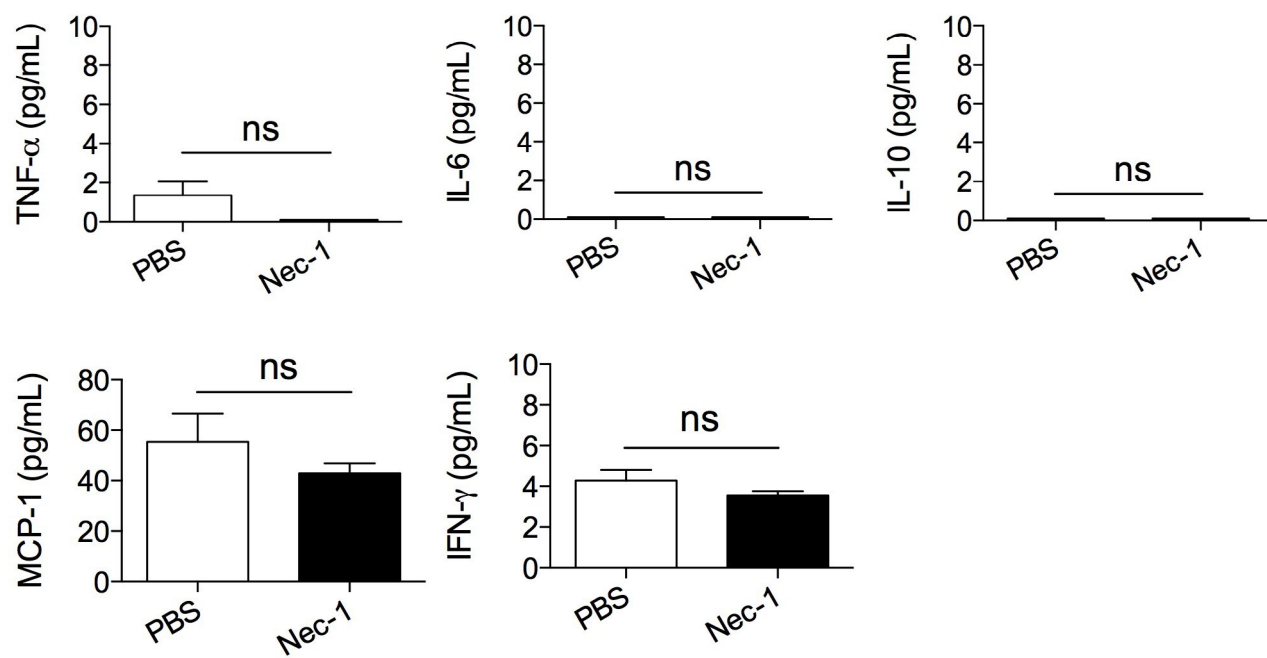

B

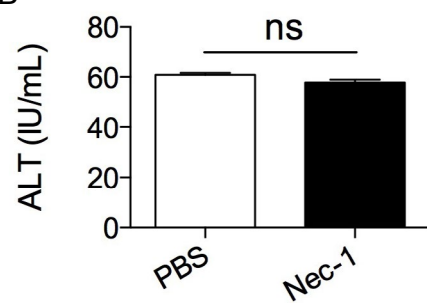

C

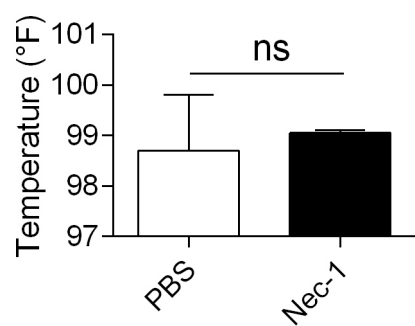

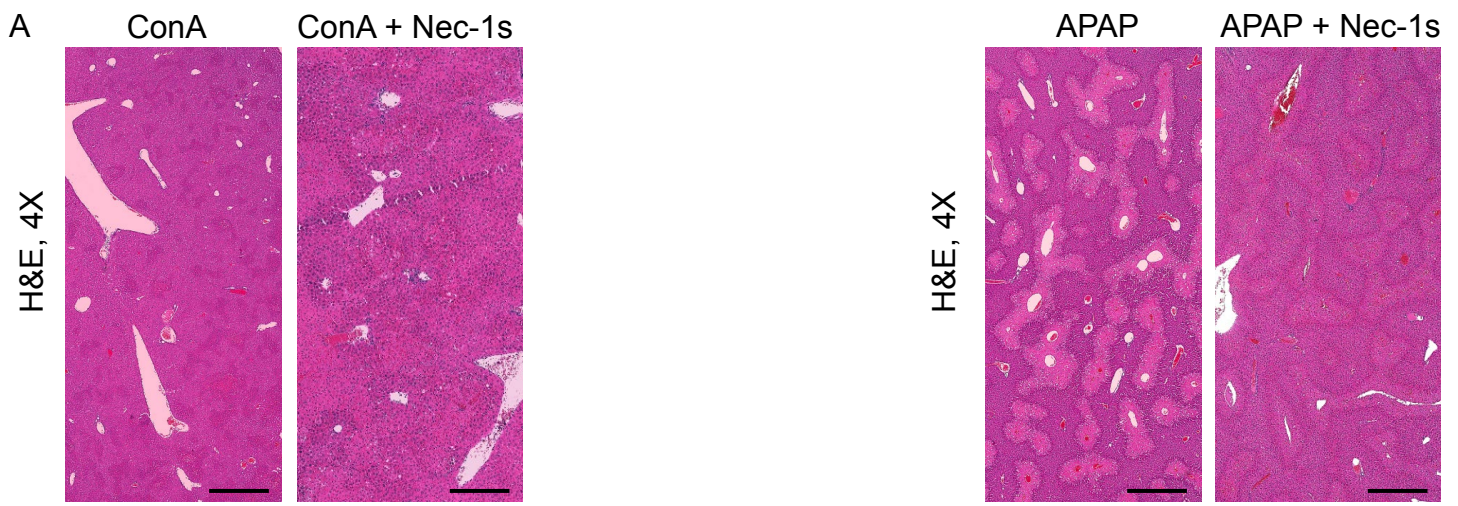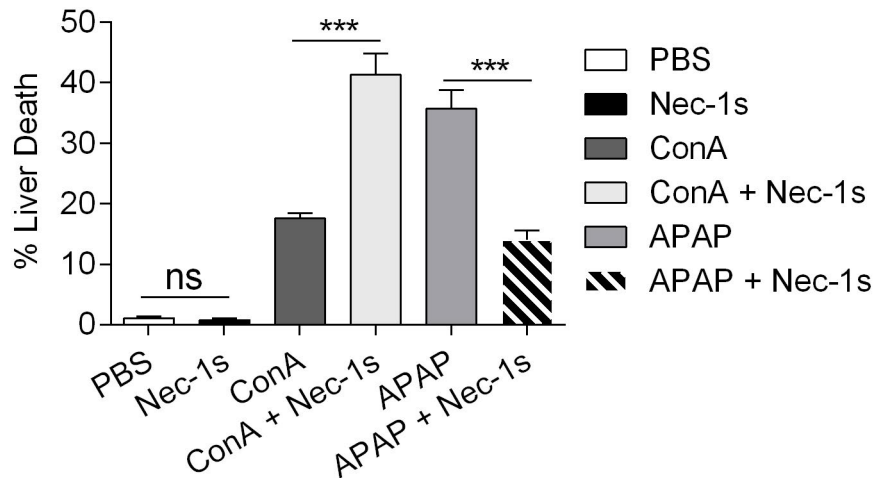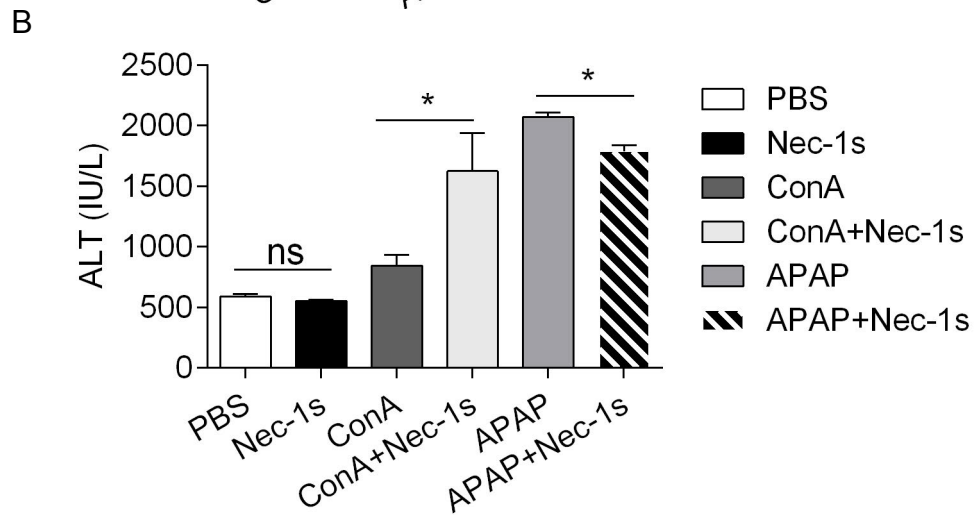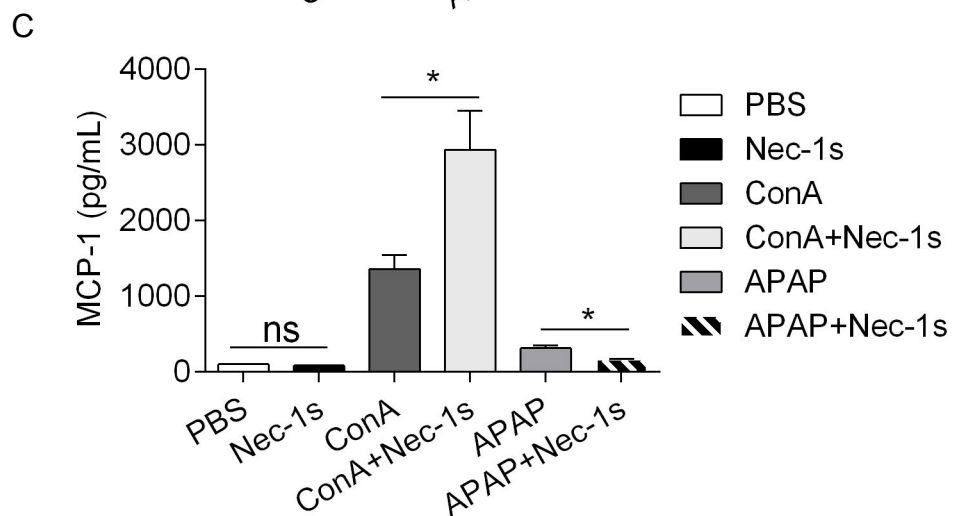

Supplemental Figure 6

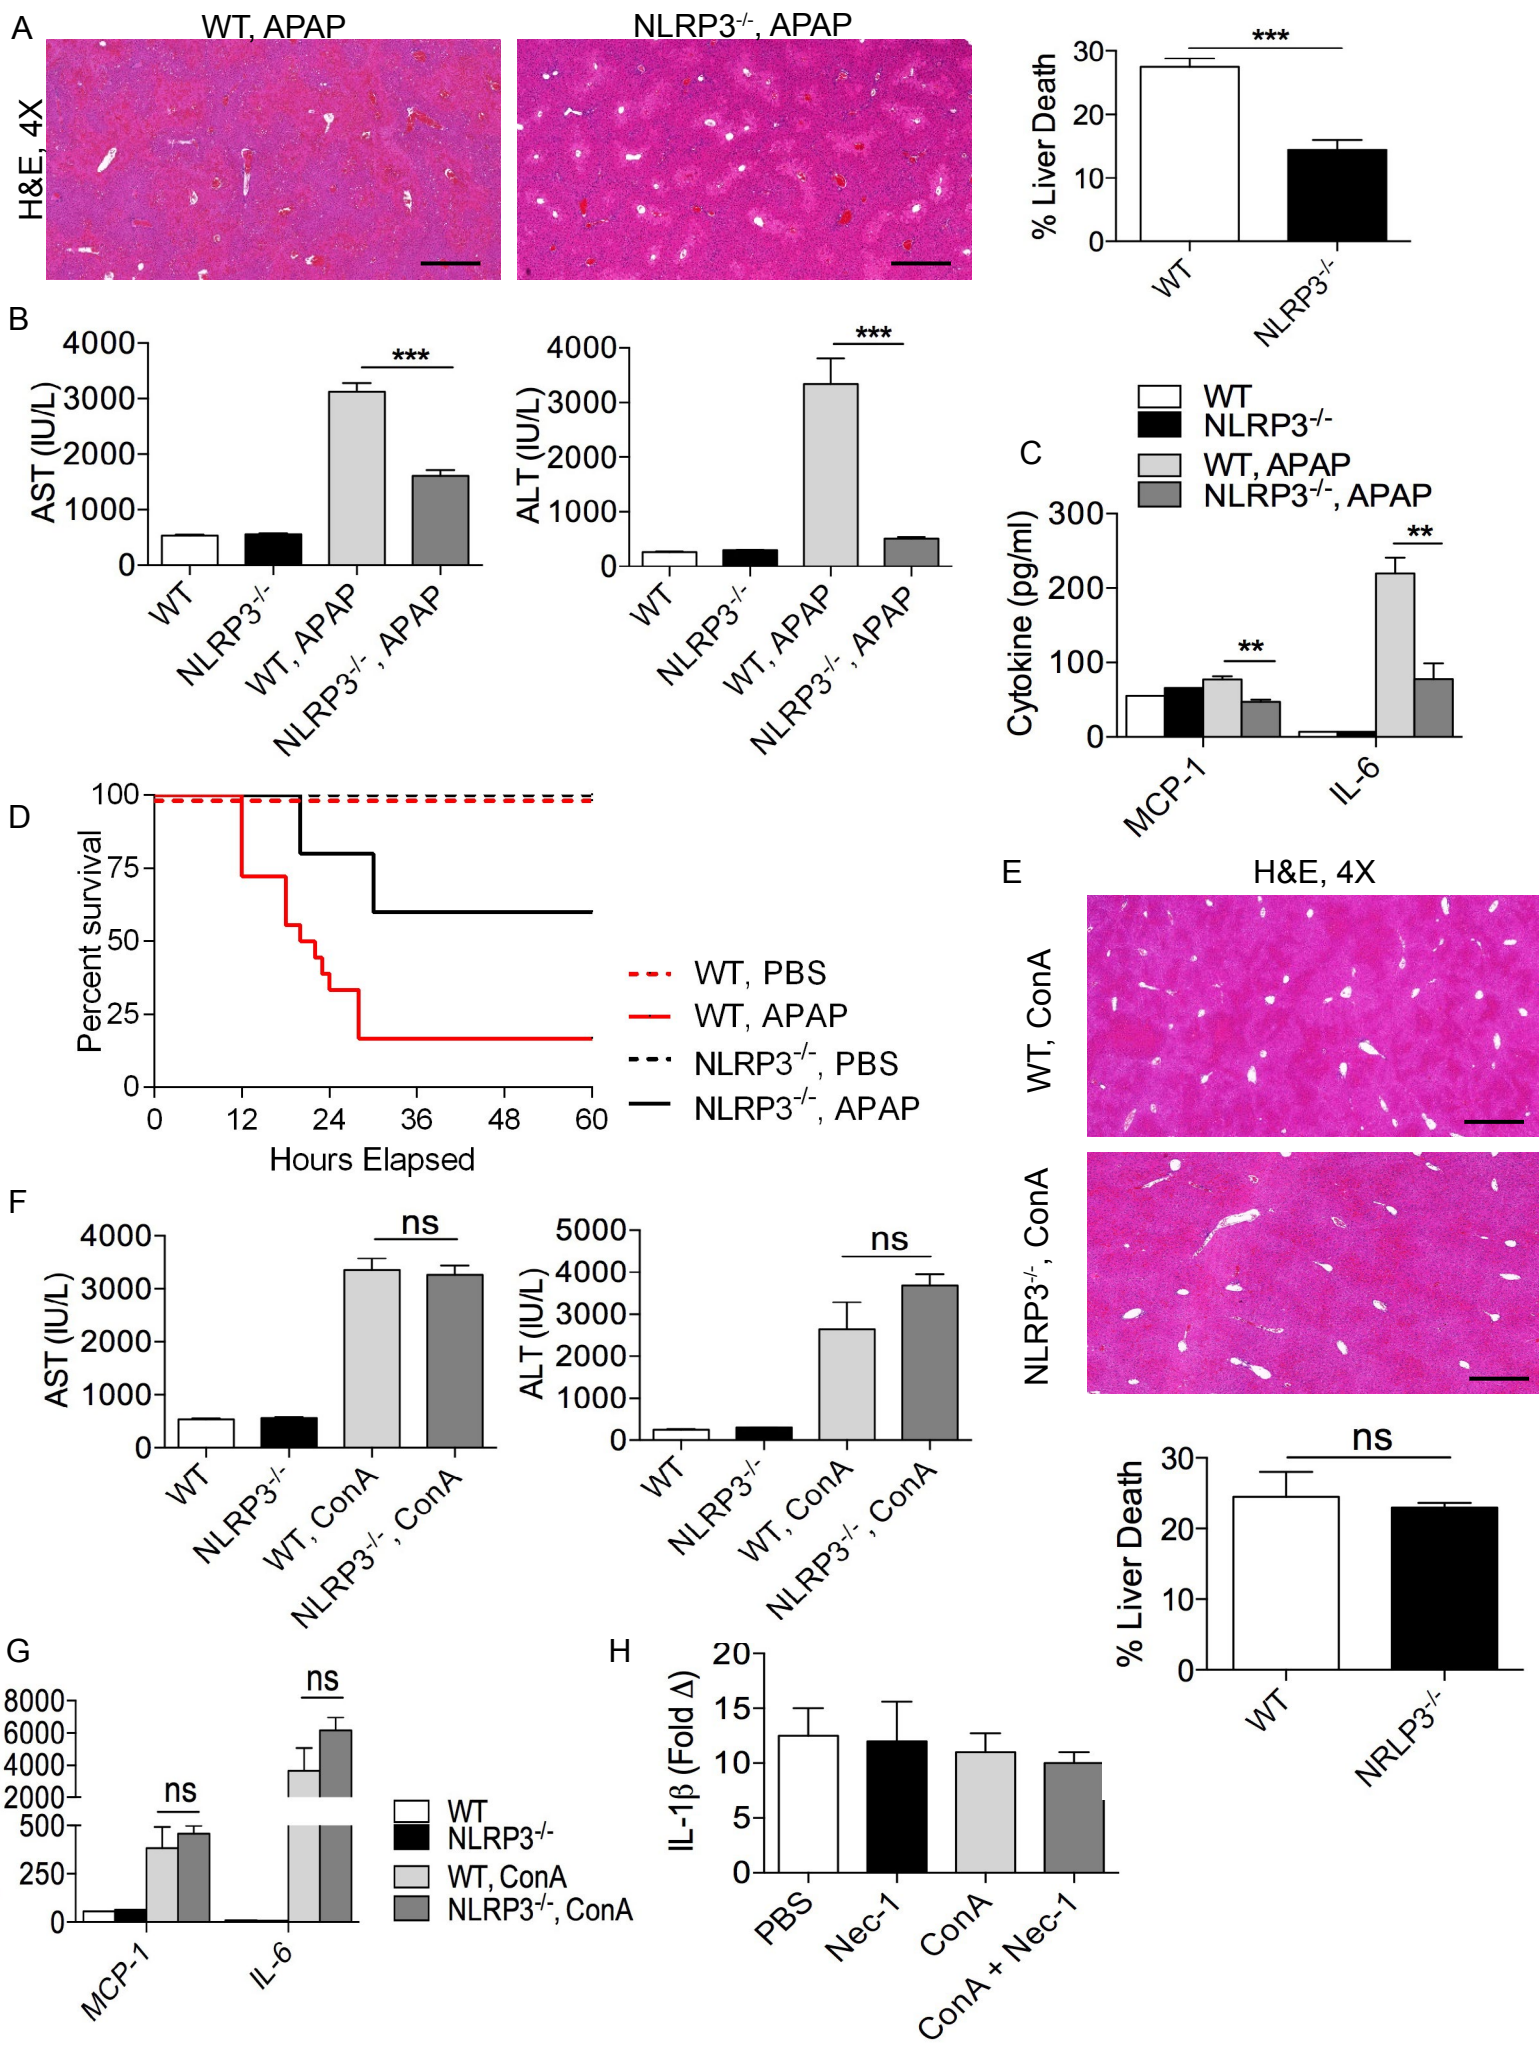

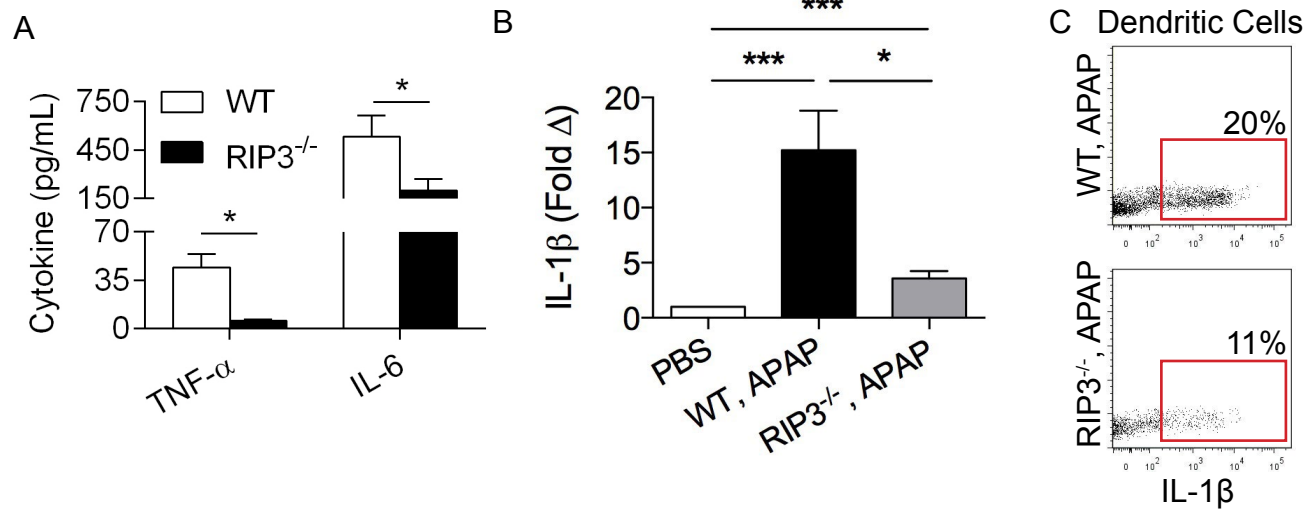

Supplement: cddis2015126x1.pdf [file cddis2015126x1.pdf]
